# Supplementary material for: Dendrobaena veneta avoids ethyl pentanoate and ethyl hexanoate, two compounds produced by the soil fungus Geotrichum candidum
Source: PeerJ. 2021 Sep 8;9:e12148. doi: 10.7717/peerj.12148 (PMC8434804; doi:10.7717/peerj.12148)
Supplement: Supplemental Information 1 — The raw data in a “tidy” format for the T-maze and burrowing assays are stored in worksheets titled “Tmaze” and “burrowing”. Each line represents a single replicate. Columns are as follows: Compound is the name of the chemical tested; Concentration.mM is the millimolar (mM) concentration of the chemical tested; head. location is the location of the worm’s head at the end of the T-maze assay; score is the numerical score assigned to each replicate in the T-maze based on the location of the worms head; number.worms is the number of worms tested in each burrowing assay replicate, always 10 for these experiments; number.burrowed is the number of worms whose head was under the soil at the end of each burrowing assay replicate; number.notBurrowed is the number of worms whose head was not under the soil at the end of each burrowing assay replicate. [file peerj-09-12148-s001.xlsx]

## Sheet: Tmaze
Compound	Concentration.mM	head.location	score
Ethyl Hexanoate	0	compound	1
Ethyl Hexanoate	0	compound	1
Ethyl Hexanoate	0	compound	1
Ethyl Hexanoate	0	compound	1
Ethyl Hexanoate	0	compound	1
Ethyl Hexanoate	0	compound	1
Ethyl Hexanoate	0	compound	1
Ethyl Hexanoate	0	compound	1
Ethyl Hexanoate	0	compound	1
Ethyl Hexanoate	0	compound	1
Ethyl Hexanoate	0	vehicle	0
Ethyl Hexanoate	0	vehicle	0
Ethyl Hexanoate	0	vehicle	0
Ethyl Hexanoate	0	vehicle	0
Ethyl Hexanoate	0	vehicle	0
Ethyl Hexanoate	0	vehicle	0
Ethyl Hexanoate	0	vehicle	0
Ethyl Hexanoate	0	vehicle	0
Ethyl Hexanoate	0	vehicle	0
Ethyl Hexanoate	0	not scored	NA
Ethyl Hexanoate	0.01	compound	1
Ethyl Hexanoate	0.01	compound	1
Ethyl Hexanoate	0.01	compound	1
Ethyl Hexanoate	0.01	compound	1
Ethyl Hexanoate	0.01	compound	1
Ethyl Hexanoate	0.01	compound	1
Ethyl Hexanoate	0.01	vehicle	0
Ethyl Hexanoate	0.01	vehicle	0
Ethyl Hexanoate	0.01	vehicle	0
Ethyl Hexanoate	0.01	vehicle	0
Ethyl Hexanoate	0.01	vehicle	0
Ethyl Hexanoate	0.01	not scored	NA
Ethyl Hexanoate	0.01	not scored	NA
Ethyl Hexanoate	0.1	compound	1
Ethyl Hexanoate	0.1	compound	1
Ethyl Hexanoate	0.1	compound	1
Ethyl Hexanoate	0.1	compound	1
Ethyl Hexanoate	0.1	vehicle	0
Ethyl Hexanoate	0.1	vehicle	0
Ethyl Hexanoate	0.1	vehicle	0
Ethyl Hexanoate	0.1	vehicle	0
Ethyl Hexanoate	0.1	vehicle	0
Ethyl Hexanoate	0.1	vehicle	0
Ethyl Hexanoate	0.1	not scored	NA
Ethyl Hexanoate	0.1	not scored	NA
Ethyl Hexanoate	1	compound	1
Ethyl Hexanoate	1	compound	1
Ethyl Hexanoate	1	compound	1
Ethyl Hexanoate	1	vehicle	0
Ethyl Hexanoate	1	vehicle	0
Ethyl Hexanoate	1	vehicle	0
Ethyl Hexanoate	1	vehicle	0
Ethyl Hexanoate	1	vehicle	0
Ethyl Hexanoate	1	vehicle	0
Ethyl Hexanoate	1	vehicle	0
Ethyl Hexanoate	1	vehicle	0
Ethyl Hexanoate	1	vehicle	0
Ethyl Hexanoate	1	vehicle	0
Ethyl Hexanoate	10	compound	1
Ethyl Hexanoate	10	compound	1
Ethyl Hexanoate	10	vehicle	0
Ethyl Hexanoate	10	vehicle	0
Ethyl Hexanoate	10	vehicle	0
Ethyl Hexanoate	10	vehicle	0
Ethyl Hexanoate	10	vehicle	0
Ethyl Hexanoate	10	vehicle	0
Ethyl Hexanoate	10	vehicle	0
Ethyl Hexanoate	10	vehicle	0
Ethyl Hexanoate	10	vehicle	0
Ethyl Hexanoate	10	vehicle	0
Ethyl Hexanoate	20	vehicle	0
Ethyl Hexanoate	20	vehicle	0
Ethyl Hexanoate	20	vehicle	0
Ethyl Hexanoate	20	vehicle	0
Ethyl Hexanoate	20	vehicle	0
Ethyl Hexanoate	20	vehicle	0
Ethyl Hexanoate	20	vehicle	0
Ethyl Hexanoate	20	vehicle	0
Ethyl Hexanoate	20	vehicle	0
Ethyl Hexanoate	20	vehicle	0
Ethyl Hexanoate	20	not scored	NA
Ethyl Hexanoate	20	not scored	NA
Ethyl Pentanoate	0	compound	1
Ethyl Pentanoate	0	compound	1
Ethyl Pentanoate	0	compound	1
Ethyl Pentanoate	0	compound	1
Ethyl Pentanoate	0	compound	1
Ethyl Pentanoate	0	compound	1
Ethyl Pentanoate	0	compound	1
Ethyl Pentanoate	0	compound	1
Ethyl Pentanoate	0	compound	1
Ethyl Pentanoate	0	compound	1
Ethyl Pentanoate	0	vehicle	0
Ethyl Pentanoate	0	vehicle	0
Ethyl Pentanoate	0	vehicle	0
Ethyl Pentanoate	0	vehicle	0
Ethyl Pentanoate	0	vehicle	0
Ethyl Pentanoate	0	vehicle	0
Ethyl Pentanoate	0	vehicle	0
Ethyl Pentanoate	0	vehicle	0
Ethyl Pentanoate	0	vehicle	0
Ethyl Pentanoate	0	not scored	NA
Ethyl Pentanoate	0.01	compound	1
Ethyl Pentanoate	0.01	compound	1
Ethyl Pentanoate	0.01	compound	1
Ethyl Pentanoate	0.01	compound	1
Ethyl Pentanoate	0.01	vehicle	0
Ethyl Pentanoate	0.01	vehicle	0
Ethyl Pentanoate	0.01	vehicle	0
Ethyl Pentanoate	0.01	vehicle	0
Ethyl Pentanoate	0.01	vehicle	0
Ethyl Pentanoate	0.01	vehicle	0
Ethyl Pentanoate	0.01	not scored	NA
Ethyl Pentanoate	0.01	not scored	NA
Ethyl Pentanoate	0.1	compound	1
Ethyl Pentanoate	0.1	compound	1
Ethyl Pentanoate	0.1	compound	1
Ethyl Pentanoate	0.1	compound	1
Ethyl Pentanoate	0.1	vehicle	0
Ethyl Pentanoate	0.1	vehicle	0
Ethyl Pentanoate	0.1	vehicle	0
Ethyl Pentanoate	0.1	vehicle	0
Ethyl Pentanoate	0.1	vehicle	0
Ethyl Pentanoate	0.1	vehicle	0
Ethyl Pentanoate	0.1	vehicle	0
Ethyl Pentanoate	0.1	not scored	NA
Ethyl Pentanoate	1	compound	1
Ethyl Pentanoate	1	compound	1
Ethyl Pentanoate	1	compound	1
Ethyl Pentanoate	1	compound	1
Ethyl Pentanoate	1	compound	1
Ethyl Pentanoate	1	vehicle	0
Ethyl Pentanoate	1	vehicle	0
Ethyl Pentanoate	1	vehicle	0
Ethyl Pentanoate	1	vehicle	0
Ethyl Pentanoate	1	vehicle	0
Ethyl Pentanoate	1	vehicle	0
Ethyl Pentanoate	1	vehicle	0
Ethyl Pentanoate	1	vehicle	0
Ethyl Pentanoate	1	vehicle	0
Ethyl Pentanoate	10	compound	1
Ethyl Pentanoate	10	compound	1
Ethyl Pentanoate	10	vehicle	0
Ethyl Pentanoate	10	vehicle	0
Ethyl Pentanoate	10	vehicle	0
Ethyl Pentanoate	10	vehicle	0
Ethyl Pentanoate	10	vehicle	0
Ethyl Pentanoate	10	vehicle	0
Ethyl Pentanoate	10	vehicle	0
Ethyl Pentanoate	10	vehicle	0
Ethyl Pentanoate	10	vehicle	0
Ethyl Pentanoate	10	vehicle	0
Ethyl Pentanoate	20	vehicle	0
Ethyl Pentanoate	20	vehicle	0
Ethyl Pentanoate	20	vehicle	0
Ethyl Pentanoate	20	vehicle	0
Ethyl Pentanoate	20	vehicle	0
Ethyl Pentanoate	20	vehicle	0
Ethyl Pentanoate	20	vehicle	0
Ethyl Pentanoate	20	vehicle	0
Ethyl Pentanoate	20	vehicle	0
Ethyl Pentanoate	20	vehicle	0
Ethyl Pentanoate	20	not scored	NA
Ethyl Pentanoate	20	not scored	NA

## Sheet: Burrowing
Compound	Concentration.mM	number.worms	number.burrowed	number.notBurrowed
Ethyl Hexanoate	40	10	0	10
Ethyl Hexanoate	40	10	0	10
Ethyl Hexanoate	40	10	0	10
Ethyl Hexanoate	40	10	0	10
Ethyl Hexanoate	40	10	0	10
Ethyl Hexanoate	40	10	0	10
Ethyl Hexanoate	25	10	0	20
Ethyl Hexanoate	25	10	0	10
Ethyl Hexanoate	25	10	1	9
Ethyl Hexanoate	25	10	0	10
Ethyl Hexanoate	25	10	1	9
Ethyl Hexanoate	25	10	0	10
Ethyl Hexanoate	10	10	2	8
Ethyl Hexanoate	10	10	2	8
Ethyl Hexanoate	10	10	3	7
Ethyl Hexanoate	10	10	3	7
Ethyl Hexanoate	10	10	2	8
Ethyl Hexanoate	10	10	3	7
Ethyl Hexanoate	1	10	9	2
Ethyl Hexanoate	1	10	9	1
Ethyl Hexanoate	1	10	7	3
Ethyl Hexanoate	1	10	7	3
Ethyl Hexanoate	1	10	9	1
Ethyl Hexanoate	1	10	10	0
Ethyl Hexanoate	0.1	10	9	1
Ethyl Hexanoate	0.1	10	10	0
Ethyl Hexanoate	0.1	10	10	0
Ethyl Hexanoate	0.1	10	10	0
Ethyl Hexanoate	0.1	10	10	0
Ethyl Hexanoate	0.1	10	10	0
Ethyl Hexanoate	0	10	9	1
Ethyl Hexanoate	0	10	10	0
Ethyl Hexanoate	0	10	10	0
Ethyl Hexanoate	0	10	10	0
Ethyl Hexanoate	0	10	10	0
Ethyl Hexanoate	0	10	10	0
Ethyl Pentanoate	25	10	1	9
Ethyl Pentanoate	25	10	0	10
Ethyl Pentanoate	25	10	1	9
Ethyl Pentanoate	25	10	0	10
Ethyl Pentanoate	25	10	1	9
Ethyl Pentanoate	25	10	1	9
Ethyl Pentanoate	10	10	8	2
Ethyl Pentanoate	10	10	8	2
Ethyl Pentanoate	10	10	9	1
Ethyl Pentanoate	10	10	10	0
Ethyl Pentanoate	10	10	8	2
Ethyl Pentanoate	10	10	9	1
Ethyl Pentanoate	1	10	9	1
Ethyl Pentanoate	1	10	10	0
Ethyl Pentanoate	1	10	9	1
Ethyl Pentanoate	1	10	10	0
Ethyl Pentanoate	1	10	10	0
Ethyl Pentanoate	1	10	10	0
Ethyl Pentanoate	0	10	10	0
Ethyl Pentanoate	0	10	10	0
Ethyl Pentanoate	0	10	10	0
Ethyl Pentanoate	0	10	10	0
Ethyl Pentanoate	0	10	10	0
Ethyl Pentanoate	0	10	10	0
Ethyl Pentanoate	20	10	1	9
Ethyl Pentanoate	20	10	2	8
Ethyl Pentanoate	20	10	2	8
Ethyl Pentanoate	20	10	2	8
Ethyl Pentanoate	20	10	2	8
Ethyl Pentanoate	20	10	2	8
Ethyl Pentanoate	40	10	0	10
Ethyl Pentanoate	40	10	0	10
Ethyl Pentanoate	40	10	0	10
Ethyl Pentanoate	40	10	0	10
Ethyl Pentanoate	40	10	0	10
Ethyl Pentanoate	40	10	0	10
